# Supplementary material for: Machine Learning Analysis of Postkeratoplasty Endothelial Cell Images for the Prediction of Future Graft Rejection
Source: PubMed Central journal article supplement — Transl Vis Sci Technol. 2023 Feb 15;12(2):22. doi: 10.1167/tvst.12.2.22 (PMC9940770; doi:10.1167/tvst.12.2.22), 2023-02-15
Supplement: tvst-12-2-22_s001.pdf [file tvst-12-2-22_s001.pdf]

Supplemental 1. Full list of the 432 features extracted in this study

Supplemental 2. Correlation matrices of 246 features with  $<0.95$  Spearman correlation coefficients collected from the last imaging time point prior to rejection (T2).

Supplemental 3. Held-out test set patient confusion matrices of final random forest models trained on top 3, 5, 7, and 10 features, and on 3 traditional features (ECD, CV, and HEX) computed from images taken at the last imaging time point prior to rejection, the second-to-last imaging time point prior to rejection, and the delta-radiomic data points.

Supplemental 4. Held-out test set patient confusion matrices of final logistic regression models trained on top 3, 5, 7, and 10 features, and on 3 traditional features (ECD, CV, and HEX) computed from images taken at the last imaging time point prior to rejection, the second-to-last imaging time point prior to rejection, and the delta-radiomic data points.

Supplemental 5. Comparison of an intensity feature between rejection (left) and control (right) patients. The two rejection images on the left were taken from a single patient eye 12 months and 18 months post-DMEK. The two images on the right were taken from a single patient eye 19 and 25 months post-DMEK. The violin and box plot compare the distribution of the number of image pixel intensities within the segmented cellular area between 163.2 and 173.4 mean cell circularity in a given calculated from control and rejection eye images.

| Feature Category | Feature Description                                               |
|------------------|-------------------------------------------------------------------|
| Intensity        | average of cells average intensities                              |
| Intensity        | average of cells max intensities                                  |
| Intensity        | average of cells min intensities                                  |
| Intensity        | average of cells std dev intensities                              |
| Intensity        | average of cells kurtosis intensities                             |
| Intensity        | average of number of cells outlier pixel intensities              |
| Intensity        | average of number of cell pixel intensities between 0-10.2        |
| Intensity        | average of number of cell pixel intensities between 10.2 - 20.4   |
| Intensity        | average of number of cell pixel intensities between 20.4 - 30.6   |
| Intensity        | average of number of cell pixel intensities between 30.6 - 40.8   |
| Intensity        | average of number of cell pixel intensities between 40.8 - 51     |
| Intensity        | average of number of cell pixel intensities between 51 - 61.2     |
| Intensity        | average of number of cell pixel intensities between 61.2 - 71.4   |
| Intensity        | average of number of cell pixel intensities between 71.4 - 81.6   |
| Intensity        | average of number of cell pixel intensities between 81.6 - 91.8   |
| Intensity        | average of number of cell pixel intensities between 91.8 - 102    |
| Intensity        | average of number of cell pixel intensities between 102 - 112.2   |
| Intensity        | average of number of cell pixel intensities between 112.2 122.4   |
| Intensity        | average of number of cell pixel intensities between 122.4 - 132.6 |
| Intensity        | average of number of cell pixel intensities between 132.6 - 142.8 |
| Intensity        | average of number of cell pixel intensities between 142.8 - 153   |
| Intensity        | average of number of cell pixel intensities between 153 - 163.2   |
| Intensity        | average of number of cell pixel intensities between 163.2 - 173.4 |
| Intensity        | average of number of cell pixel intensities between 173.4 - 183.6 |
| Intensity        | average of number of cell pixel intensities between 183.6 - 193.8 |
| Intensity        | average of number of cell pixel intensities between 193.8 - 204   |
| Intensity        | average of number of cell pixel intensities between 204 - 214.2   |
| Intensity        | average of number of cell pixel intensities between 214.2 - 224.4 |
| Intensity        | average of number of cell pixel intensities between 224.4 - 234.6 |
| Intensity        | average of number of cell pixel intensities between 234.6 - 244.8 |
| Intensity        | average of number of cell pixel intensities between 244.8 - 255   |
| Intensity        | std dev of cells average intensities                              |
| Intensity        | std dev of cells max intensities                                  |
| Intensity        | std dev of cells min intensities                                  |
| Intensity        | std dev of cells std dev intensities                              |
| Intensity        | std dev of cells kurtosis intensities                             |
| Intensity        | std dev of number of cells outlier pixel intensities              |
| Intensity        | std dev of number of cell pixel intensities between 0-10.2        |
| Intensity        | std dev of number of cell pixel intensities between 10.2 - 20.4   |
| Intensity        | std dev of number of cell pixel intensities between 20.4 - 30.6   |
| Intensity        | std dev of number of cell pixel intensities between 30.6 - 40.8   |
| Intensity        | std dev of number of cell pixel intensities between 40.8 - 51     |
| Intensity        | std dev of number of cell pixel intensities between 51 - 61.2     |
| Intensity        | std dev of number of cell pixel intensities between 61.2 - 71.4   |
| Intensity        | std dev of number of cell pixel intensities between 71.4 - 81.6   |
| Intensity        | std dev of number of cell pixel intensities between 81.6 - 91.8   |

|           |                                                                   |
|-----------|-------------------------------------------------------------------|
| Intensity | std dev of number of cell pixel intensities between 91.8 - 102    |
| Intensity | std dev of number of cell pixel intensities between 102 - 112.2   |
| Intensity | std dev of number of cell pixel intensities between 112.2 - 122.4 |
| Intensity | std dev of number of cell pixel intensities between 122.4 - 132.6 |
| Intensity | std dev of number of cell pixel intensities between 132.6 - 142.8 |
| Intensity | std dev of number of cell pixel intensities between 142.8 - 153   |
| Intensity | std dev of number of cell pixel intensities between 153 - 163.2   |
| Intensity | std dev of number of cell pixel intensities between 163.2 - 173.4 |
| Intensity | std dev of number of cell pixel intensities between 173.4 - 183.6 |
| Intensity | std dev of number of cell pixel intensities between 183.6 - 193.8 |
| Intensity | std dev of number of cell pixel intensities between 193.8 - 204   |
| Intensity | std dev of number of cell pixel intensities between 204 - 214.2   |
| Intensity | std dev of number of cell pixel intensities between 214.2 - 224.4 |
| Intensity | std dev of number of cell pixel intensities between 224.4 - 234.6 |
| Intensity | std dev of number of cell pixel intensities between 234.6 - 244.8 |
| Intensity | std dev of number of cell pixel intensities between 244.8 - 255   |
| Intensity | average of image pixel intensities                                |
| Intensity | std dev of image pixel intensities                                |
| Intensity | kurtosis of image pixel intensities                               |
| Intensity | number of image pixel intensities between 0-10.2                  |
| Intensity | number of image pixel intensities between 10.2 - 20.4             |
| Intensity | number of image pixel intensities between 20.4 - 30.6             |
| Intensity | number of image pixel intensities between 30.6 - 40.8             |
| Intensity | number of image pixel intensities between 40.8 - 51               |
| Intensity | number of image pixel intensities between 51 - 61.2               |
| Intensity | number of image pixel intensities between 61.2 - 71.4             |
| Intensity | number of image pixel intensities between 71.4 - 81.6             |
| Intensity | number of image pixel intensities between 81.6 - 91.8             |
| Intensity | number of image pixel intensities between 91.8 - 102              |
| Intensity | number of image pixel intensities between 102 - 112.2             |
| Intensity | number of image pixel intensities between 112.2 - 122.4           |
| Intensity | number of image pixel intensities between 122.4 - 132.6           |
| Intensity | number of image pixel intensities between 132.6 - 142.8           |
| Intensity | number of image pixel intensities between 142.8 - 153             |
| Intensity | number of image pixel intensities between 153 - 163.2             |
| Intensity | number of image pixel intensities between 163.2 - 173.4           |
| Intensity | number of image pixel intensities between 173.4 - 183.6           |
| Intensity | number of image pixel intensities between 183.6 - 193.8           |
| Intensity | number of image pixel intensities between 193.8 - 204             |
| Intensity | number of image pixel intensities between 204 - 214.2             |
| Intensity | number of image pixel intensities between 214.2 - 224.4           |
| Intensity | number of image pixel intensities between 224.4 - 234.6           |
| Intensity | number of image pixel intensities between 234.6 - 244.8           |
| Intensity | number of image pixel intensities between 244.8 - 255             |
| Intensity | average of cells weighted average intensities                     |
| Intensity | average of cells weighted max intensities                         |
| Intensity | average of cells weighted min intensities                         |

|           |                                                                            |
|-----------|----------------------------------------------------------------------------|
| Intensity | average of cells weighted std dev intensities                              |
| Intensity | average of cells weighted kurtosis intensities                             |
| Intensity | average of number of cells weighted outlier pixel intensities              |
| Intensity | average of number of cell pixel weighted intensities between 0-10.2        |
| Intensity | average of number of cell pixel weighted intensities between 10.2 - 20.4   |
| Intensity | average of number of cell pixel weighted intensities between 20.4 - 30.6   |
| Intensity | average of number of cell pixel weighted intensities between 30.6 - 40.8   |
| Intensity | average of number of cell pixel weighted intensities between 40.8 - 51     |
| Intensity | average of number of cell pixel weighted intensities between 51 - 61.2     |
| Intensity | average of number of cell pixel weighted intensities between 61.2 - 71.4   |
| Intensity | average of number of cell pixel weighted intensities between 71.4 - 81.6   |
| Intensity | average of number of cell pixel weighted intensities between 81.6 - 91.8   |
| Intensity | average of number of cell pixel weighted intensities between 91.8 - 102    |
| Intensity | average of number of cell pixel weighted intensities between 102 - 112.2   |
| Intensity | average of number of cell pixel weighted intensities between 112.2 - 122.4 |
| Intensity | average of number of cell pixel weighted intensities between 122.4 - 132.6 |
| Intensity | average of number of cell pixel weighted intensities between 132.6 - 142.8 |
| Intensity | average of number of cell pixel weighted intensities between 142.8 - 153   |
| Intensity | average of number of cell pixel weighted intensities between 153 - 163.2   |
| Intensity | average of number of cell pixel weighted intensities between 163.2 - 173.4 |
| Intensity | average of number of cell pixel weighted intensities between 173.4 - 183.6 |
| Intensity | average of number of cell pixel weighted intensities between 183.6 - 193.8 |
| Intensity | average of number of cell pixel weighted intensities between 193.8 - 204   |
| Intensity | average of number of cell pixel weighted intensities between 204 - 214.2   |
| Intensity | average of number of cell pixel weighted intensities between 214.2 - 224.4 |
| Intensity | average of number of cell pixel weighted intensities between 224.4 - 234.6 |
| Intensity | average of number of cell pixel weighted intensities between 234.6 - 244.8 |
| Intensity | average of number of cell pixel weighted intensities between 244.8 - 255   |
| Intensity | std dev of cells weighted average intensities                              |
| Intensity | std dev of cells weighted max intensities                                  |
| Intensity | std dev of cells weighted min intensities                                  |
| Intensity | std dev of cells weighted std dev intensities                              |
| Intensity | std dev of cells weighted kurtosis intensities                             |
| Intensity | std dev of number of cells weighted outlier pixel intensities              |
| Intensity | std dev of number of cell pixel weighted intensities between 10.2 - 20.4   |
| Intensity | std dev of number of cell pixel weighted intensities between 20.4 - 30.6   |
| Intensity | std dev of number of cell pixel weighted intensities between 30.6 - 40.8   |
| Intensity | std dev of number of cell pixel weighted intensities between 40.8 - 51     |
| Intensity | std dev of number of cell pixel weighted intensities between 51 - 61.2     |
| Intensity | std dev of number of cell pixel weighted intensities between 61.2 - 71.4   |
| Intensity | std dev of number of cell pixel weighted intensities between 71.4 - 81.6   |
| Intensity | std dev of number of cell pixel weighted intensities between 81.6 - 91.8   |
| Intensity | std dev of number of cell pixel weighted intensities between 91.8 - 102    |
| Intensity | std dev of number of cell pixel weighted intensities between 102 - 112.2   |
| Intensity | std dev of number of cell pixel weighted intensities between 112.2 - 122.4 |
| Intensity | std dev of number of cell pixel weighted intensities between 122.4 - 132.6 |
| Intensity | std dev of number of cell pixel weighted intensities between 132.6 - 142.8 |

|           |                                                                            |
|-----------|----------------------------------------------------------------------------|
| Intensity | std dev of number of cell pixel weighted intensities between 142.8 - 153   |
| Intensity | std dev of number of cell pixel weighted intensities between 153 - 163.2   |
| Intensity | std dev of number of cell pixel weighted intensities between 163.2 - 173.4 |
| Intensity | std dev of number of cell pixel weighted intensities between 173.4 - 183.6 |
| Intensity | std dev of number of cell pixel weighted intensities between 183.6 - 193.8 |
| Intensity | std dev of number of cell pixel weighted intensities between 193.8 - 204   |
| Intensity | std dev of number of cell pixel weighted intensities between 204 - 214.2   |
| Intensity | std dev of number of cell pixel weighted intensities between 214.2 - 224.4 |
| Intensity | std dev of number of cell pixel weighted intensities between 224.4 - 234.6 |
| Intensity | std dev of number of cell pixel weighted intensities between 234.6 - 244.8 |
| Intensity | std dev of number of cell pixel weighted intensities between 244.8 - 255   |
| Intensity | std dev of number of cell pixel weighted intensities between 205-255       |
| Intensity | percentage of image pixel intensities between 0-10.2                       |
| Intensity | percentage of image pixel intensities between 10.2 - 20.4                  |
| Intensity | percentage of image pixel intensities between 20.4 - 30.6                  |
| Intensity | percentage of image pixel intensities between 30.6 - 40.8                  |
| Intensity | percentage of image pixel intensities between 40.8 - 51                    |
| Intensity | percentage of image pixel intensities between 51 - 61.2                    |
| Intensity | percentage of image pixel intensities between 61.2 - 71.4                  |
| Intensity | percentage of image pixel intensities between 71.4 - 81.6                  |
| Intensity | percentage of image pixel intensities between 81.6 - 91.8                  |
| Intensity | percentage of image pixel intensities between 91.8 - 102                   |
| Intensity | percentage of image pixel intensities between 102 - 112.2                  |
| Intensity | percentage of image pixel intensities between 112.2 - 122.4                |
| Intensity | percentage of image pixel intensities between 122.4 - 132.6                |
| Intensity | percentage of image pixel intensities between 132.6 - 142.8                |
| Intensity | percentage of image pixel intensities between 142.8 - 153                  |
| Intensity | percentage of image pixel intensities between 153 - 163.2                  |
| Intensity | percentage of image pixel intensities between 163.2 - 173.4                |
| Intensity | percentage of image pixel intensities between 173.4 - 183.6                |
| Intensity | percentage of image pixel intensities between 183.6 - 193.8                |
| Intensity | percentage of image pixel intensities between 193.8 - 204                  |
| Intensity | percentage of image pixel intensities between 204 - 214.2                  |
| Intensity | percentage of image pixel intensities between 214.2 - 224.4                |
| Intensity | percentage of image pixel intensities between 224.4 - 234.6                |
| Intensity | percentage of image pixel intensities between 234.6 - 244.8                |
| Intensity | percentage of image pixel intensities between 244.8 - 255                  |
| Texture   | average cell entropy                                                       |
| Texture   | average cell skewness                                                      |
| Texture   | average cell U                                                             |
| Texture   | average cell R                                                             |
| Texture   | std dev cell entropy                                                       |
| Texture   | std dev cell skewness                                                      |
| Texture   | std dev cell U                                                             |
| Texture   | std dev cell R                                                             |
| Texture   | average cell weighted entropy                                              |
| Texture   | average cell weighted skewness                                             |

|         |                                                           |
|---------|-----------------------------------------------------------|
| Texture | average cell weighted U                                   |
| Texture | average cell weighted R                                   |
| Texture | std dev cell weighted entropy                             |
| Texture | std dev cell weighted skewness                            |
| Texture | std dev cell weighted U                                   |
| Texture | std dev cell weighted R                                   |
| Shape   | mean cell area                                            |
| Shape   | std dev cell area                                         |
| Shape   | kurtosis of cell area                                     |
| Shape   | number of cells with area between 0 - 80 pixels           |
| Shape   | number of cells with area between 80 - 160 pixels         |
| Shape   | number of cells with area between 160 - 240 pixels        |
| Shape   | number of cells with area between 240 - 320 pixels        |
| Shape   | number of cells with area between 320 - 400 pixels        |
| Shape   | number of cells with area between 400 - 480 pixels        |
| Shape   | number of cells with area between 480 - 560 pixels        |
| Shape   | number of cells with area between 560 - 640 pixels        |
| Shape   | number of cells with area between 640 - 720 pixels        |
| Shape   | number of cells with area between 720 - 800 pixels        |
| Shape   | number of cells with area between 800 - 880 pixels        |
| Shape   | number of cells with area between 880 - 960 pixels        |
| Shape   | number of cells with area between 960 - 1040 pixels       |
| Shape   | number of cells with area between 1040 - 1120 pixels      |
| Shape   | number of cells with area between 1120 - 1200 pixels      |
| Shape   | number of cells with area between 1200 - 1280 pixels      |
| Shape   | number of cells with area between 1280 - 1360 pixels      |
| Shape   | number of cells with area between 1360 - 1440 pixels      |
| Shape   | number of cells with area between 1440 - 1520 pixels      |
| Shape   | number of cells with area between 1520 - 1600 pixels      |
| Shape   | number of cells with area between 1600 - 1680 pixels      |
| Shape   | number of cells with area between 1680 - 1760 pixels      |
| Shape   | number of cells with area between 1760 - 1840 pixels      |
| Shape   | number of cells with area between 1840 - 1920 pixels      |
| Shape   | number of cells with area between 1920 - 2000 pixels      |
| Shape   | number of cells with an area greater than 2000 pixels     |
| Shape   | mean cell perimeter                                       |
| Shape   | std dev cell perimeter                                    |
| Shape   | kurtosis of cell perimeter                                |
| Shape   | number of cells with perimeter between 20 - 27.2 pixels   |
| Shape   | number of cells with perimeter between 27.2 - 34.4 pixels |
| Shape   | number of cells with perimeter between 34.4 - 41.6 pixels |
| Shape   | number of cells with perimeter between 41.6 - 48.8 pixels |
| Shape   | number of cells with perimeter between 48.8 - 56 pixels   |
| Shape   | number of cells with perimeter between 56 - 63.2 pixels   |
| Shape   | number of cells with perimeter between 63.2 - 70.4 pixels |
| Shape   | number of cells with perimeter between 70.4 - 77.6 pixels |
| Shape   | number of cells with perimeter between 77.6 - 84.8 pixels |

|       |                                                                     |
|-------|---------------------------------------------------------------------|
| Shape | number of cells with perimeter between 84.4 - 92 pixels             |
| Shape | number of cells with perimeter between 92 - 99.2 pixels             |
| Shape | number of cells with perimeter between 99.2 - 106.4 pixels          |
| Shape | number of cells with perimeter between 106.4 - 113.6 pixels         |
| Shape | number of cells with perimeter between 113.6 - 120.8 pixels         |
| Shape | number of cells with perimeter between 120.8 - 128 pixels           |
| Shape | number of cells with perimeter between 128 - 135.2 pixels           |
| Shape | number of cells with perimeter between 135.2 - 142.4 pixels         |
| Shape | number of cells with perimeter between 142.4 - 149.6 pixels         |
| Shape | number of cells with perimeter between 149.6 - 156.8 pixels         |
| Shape | number of cells with perimeter between 156.8 - 164 pixels           |
| Shape | number of cells with perimeter between 164 - 171.2 pixels           |
| Shape | number of cells with perimeter between 171.2 - 178.4 pixels         |
| Shape | number of cells with perimeter between 178.4 - 185.6 pixels         |
| Shape | number of cells with perimeter between 185.6 - 192.8 pixels         |
| Shape | number of cells with perimeter between 192.8 - 200 pixels           |
| Shape | number of cells with perimeter greater than 200 pixels              |
| Shape | mean cell circularity                                               |
| Shape | std dev cell circularity                                            |
| Shape | kurtosis of cell circularity                                        |
| Shape | number of cells with circularity between 0.75 - 0.76                |
| Shape | number of cells with circularity between 0.76 - 0.77                |
| Shape | number of cells with circularity between 0.77 - 0.78                |
| Shape | number of cells with circularity between 0.78 - 0.79                |
| Shape | number of cells with circularity between 0.79 - 0.80                |
| Shape | number of cells with circularity between 0.80 - 0.81                |
| Shape | number of cells with circularity between 0.81 - 0.82                |
| Shape | number of cells with circularity between 0.82 - 0.83                |
| Shape | number of cells with circularity between 0.83 - 0.84                |
| Shape | number of cells with circularity between 0.84 - 0.85                |
| Shape | number of cells with circularity between 0.85 - 0.86                |
| Shape | number of cells with circularity between 0.86 - 0.87                |
| Shape | number of cells with circularity between 0.87 - 0.88                |
| Shape | number of cells with circularity between 0.88 - 0.89                |
| Shape | number of cells with circularity between 0.89 - 0.90                |
| Shape | number of cells with circularity between 0.90 - 0.91                |
| Shape | number of cells with circularity between 0.91 - 0.92                |
| Shape | number of cells with circularity between 0.92 - 0.93                |
| Shape | number of cells with circularity between 0.93 - 0.94                |
| Shape | number of cells with circularity between 0.94 - 0.95                |
| Shape | number of cells with circularity between 0.95 - 0.96                |
| Shape | number of cells with circularity between 0.96 - 0.97                |
| Shape | number of cells with circularity between 0.97 - 0.98                |
| Shape | number of cells with circularity between 0.98 - 0.99                |
| Shape | number of cells with circularity between 0.99 - 2.0                 |
| Shape | number of cells with circularity less than 0.75 or greater than 1.0 |
| Shape | percentage of cells with area between 0 - 80 pixels                 |

|       |                                                                 |
|-------|-----------------------------------------------------------------|
| Shape | percentage of cells with area between 80 - 160 pixels           |
| Shape | percentage of cells with area between 160 - 240 pixels          |
| Shape | percentage of cells with area between 240 - 320 pixels          |
| Shape | percentage of cells with area between 320 - 400 pixels          |
| Shape | percentage of cells with area between 400 - 480 pixels          |
| Shape | percentage of cells with area between 480 - 560 pixels          |
| Shape | percentage of cells with area between 560 - 640 pixels          |
| Shape | percentage of cells with area between 640 - 720 pixels          |
| Shape | percentage of cells with area between 720 - 800 pixels          |
| Shape | percentage of cells with area between 800 - 880 pixels          |
| Shape | percentage of cells with area between 880 - 960 pixels          |
| Shape | percentage of cells with area between 960 - 1040 pixels         |
| Shape | percentage of cells with area between 1040 - 1120 pixels        |
| Shape | percentage of cells with area between 1120 - 1200 pixels        |
| Shape | percentage of cells with area between 1200 - 1280 pixels        |
| Shape | percentage of cells with area between 1280 - 1360 pixels        |
| Shape | percentage of cells with area between 1360 - 1440 pixels        |
| Shape | percentage of cells with area between 1440 - 1520 pixels        |
| Shape | percentage of cells with area between 1520 - 1600 pixels        |
| Shape | percentage of cells with area between 1600 - 1680 pixels        |
| Shape | percentage of cells with area between 1680 - 1760 pixels        |
| Shape | percentage of cells with area between 1760 - 1840 pixels        |
| Shape | percentage of cells with area between 1840 - 1920 pixels        |
| Shape | percentage of cells with area between 1920 - 2000 pixels        |
| Shape | percentage of cells with perimeter between 20 - 27.2 pixels     |
| Shape | percentage of cells with perimeter between 27.2 - 34.4 pixels   |
| Shape | percentage of cells with perimeter between 34.4 - 41.6 pixels   |
| Shape | percentage of cells with perimeter between 41.6 - 48.8 pixels   |
| Shape | percentage of cells with perimeter between 48.8 - 56 pixels     |
| Shape | percentage of cells with perimeter between 56 - 63.2 pixels     |
| Shape | percentage of cells with perimeter between 63.2 - 70.4 pixels   |
| Shape | percentage of cells with perimeter between 70.4 - 77.6 pixels   |
| Shape | percentage of cells with perimeter between 77.6 - 84.8 pixels   |
| Shape | percentage of cells with perimeter between 84.4 - 92 pixels     |
| Shape | percentage of cells with perimeter between 92 - 99.2 pixels     |
| Shape | percentage of cells with perimeter between 99.2 - 106.4 pixels  |
| Shape | percentage of cells with perimeter between 106.4 - 113.6 pixels |
| Shape | percentage of cells with perimeter between 113.6 - 120.8 pixels |
| Shape | percentage of cells with perimeter between 120.8 - 128 pixels   |
| Shape | percentage of cells with perimeter between 128 - 135.2 pixels   |
| Shape | percentage of cells with perimeter between 135.2 - 142.4 pixels |
| Shape | percentage of cells with perimeter between 142.4 - 149.6 pixels |
| Shape | percentage of cells with perimeter between 149.6 - 156.8 pixels |
| Shape | percentage of cells with perimeter between 156.8 - 164 pixels   |
| Shape | percentage of cells with perimeter between 164 - 171.2 pixels   |
| Shape | percentage of cells with perimeter between 171.2 - 178.4 pixels |
| Shape | percentage of cells with perimeter between 178.4 - 185.6 pixels |



|          |                                                                 |
|----------|-----------------------------------------------------------------|
| Shape    | percentage of cells with perimeter between 185.6 - 192.8 pixels |
| Shape    | percentage of cells with perimeter between 192.8 - 200 pixels   |
| Shape    | percentage of cells with circularity between 0.75 - 0.76        |
| Shape    | percentage of cells with circularity between 0.76 - 0.77        |
| Shape    | percentage of cells with circularity between 0.77 - 0.78        |
| Shape    | percentage of cells with circularity between 0.78 - 0.79        |
| Shape    | percentage of cells with circularity between 0.79 - 0.80        |
| Shape    | percentage of cells with circularity between 0.80 - 0.81        |
| Shape    | percentage of cells with circularity between 0.81 - 0.82        |
| Shape    | percentage of cells with circularity between 0.82 - 0.83        |
| Shape    | percentage of cells with circularity between 0.83 - 0.84        |
| Shape    | percentage of cells with circularity between 0.84 - 0.85        |
| Shape    | percentage of cells with circularity between 0.85 - 0.86        |
| Shape    | percentage of cells with circularity between 0.86 - 0.87        |
| Shape    | percentage of cells with circularity between 0.87 - 0.88        |
| Shape    | percentage of cells with circularity between 0.88 - 0.89        |
| Shape    | percentage of cells with circularity between 0.89 - 0.90        |
| Shape    | percentage of cells with circularity between 0.90 - 0.91        |
| Shape    | percentage of cells with circularity between 0.91 - 0.92        |
| Shape    | percentage of cells with circularity between 0.92 - 0.93        |
| Shape    | percentage of cells with circularity between 0.93 - 0.94        |
| Shape    | percentage of cells with circularity between 0.94 - 0.95        |
| Shape    | percentage of cells with circularity between 0.95 - 0.96        |
| Shape    | percentage of cells with circularity between 0.96 - 0.97        |
| Shape    | percentage of cells with circularity between 0.97 - 0.98        |
| Shape    | percentage of cells with circularity between 0.98 - 0.99        |
| Shape    | percentage of cells with circularity between 0.99 - 2.0         |
| Voronoi  | Area Standard Deviation                                         |
| Voronoi  | Area Average                                                    |
| Voronoi  | Area Minimum / Maximum                                          |
| Voronoi  | Area Disorder                                                   |
| Voronoi  | Perimeter Standard Deviation                                    |
| Voronoi  | Perimeter Average                                               |
| Voronoi  | Perimeter Minimum / Maximum                                     |
| Voronoi  | Perimeter Disorder                                              |
| Voronoi  | Chord Standard Deviation                                        |
| Voronoi  | Chord Average                                                   |
| Voronoi  | Chord Minimum / Maximum                                         |
| Voronoi  | Chord Disorder                                                  |
| Delaunay | Side Length Minimum / Maximum                                   |
| Delaunay | Side Length Standard Deviation                                  |
| Delaunay | Side Length Average                                             |
| Delaunay | Side Length Disorder                                            |
| Delaunay | Triangle Area Minimum / Maximum                                 |
| Delaunay | Triangle Area Standard Deviation                                |
| Delaunay | Triangle Area Average                                           |
| Delaunay | Triangle Area Disorder                                          |

|                       |                                                           |
|-----------------------|-----------------------------------------------------------|
| Minimum Spanning Tree | Edge Length Average                                       |
| Minimum Spanning Tree | Edge Length Standard Deviation                            |
| Minimum Spanning Tree | Edge Length Minimum / Maximum                             |
| Minimum Spanning Tree | Edge Length Disorder                                      |
| Voronoi               | Area of polygons                                          |
| Voronoi               | Number of Polygons                                        |
| Voronoi               | Density of Polygons                                       |
| Voronoi               | Average distance to 3 Nearest Neighbors                   |
| Voronoi               | Average distance to 5 Nearest Neighbors                   |
| Voronoi               | Average distance to 7 Nearest Neighbors                   |
| Voronoi               | Standard Deviation distance to 3 Nearest Neighbors        |
| Voronoi               | Standard Deviation distance to 5 Nearest Neighbors        |
| Voronoi               | Standard Deviation distance to 7 Nearest Neighbors        |
| Voronoi               | Disorder of distance to 3 Nearest Neighbors               |
| Voronoi               | Disorder of distance to 5 Nearest Neighbors               |
| Voronoi               | Disorder of distance to 7 Nearest Neighbors               |
| Voronoi               | Avg. Nearest Neighbors in a 10 Pixel Radius               |
| Voronoi               | Avg. Nearest Neighbors in a 20 Pixel Radius               |
| Voronoi               | Avg. Nearest Neighbors in a 30 Pixel Radius               |
| Voronoi               | Avg. Nearest Neighbors in a 40 Pixel Radius               |
| Voronoi               | Avg. Nearest Neighbors in a 50 Pixel Radius               |
| Voronoi               | Standard Deviation Nearest Neighbors in a 10 Pixel Radius |
| Voronoi               | Standard Deviation Nearest Neighbors in a 20 Pixel Radius |
| Voronoi               | Standard Deviation Nearest Neighbors in a 30 Pixel Radius |
| Voronoi               | Standard Deviation Nearest Neighbors in a 40 Pixel Radius |
| Voronoi               | Standard Deviation Nearest Neighbors in a 50 Pixel Radius |
| Voronoi               | Disorder of Nearest Neighbors in a 10 Pixel Radius        |
| Voronoi               | Disorder of Nearest Neighbors in a 20 Pixel Radius        |
| Voronoi               | Disorder of Nearest Neighbors in a 30 Pixel Radius        |
| Voronoi               | Disorder of Nearest Neighbors in a 40 Pixel Radius        |
| Voronoi               | Disorder of Nearest Neighbors in a 50 Pixel Radius        |
| Cell Cluster Graph    | Number of Nodes                                           |
| Cell Cluster Graph    | Number of Edges                                           |
| Cell Cluster Graph    | Average Degree                                            |
| Cell Cluster Graph    | Average Eccentricity                                      |
| Cell Cluster Graph    | Diameter                                                  |
| Cell Cluster Graph    | Radius                                                    |
| Cell Cluster Graph    | Average Eccentricity 90\%                                 |
| Cell Cluster Graph    | Diameter 90\%                                             |
| Cell Cluster Graph    | Radius 90\%                                               |
| Cell Cluster Graph    | Average Path Length                                       |
| Cell Cluster Graph    | Clustering Coefficient C                                  |
| Cell Cluster Graph    | Clustering Coefficient D                                  |
| Cell Cluster Graph    | Clustering Coefficient E                                  |
| Cell Cluster Graph    | Number of connected components                            |
| Cell Cluster Graph    | giant connected component ratio                           |
| Cell Cluster Graph    | average connected component size                          |

|                    |                                |
|--------------------|--------------------------------|
| Cell Cluster Graph | number isolated nodes          |
| Cell Cluster Graph | percentage isolated nodes      |
| Cell Cluster Graph | number end nodes               |
| Cell Cluster Graph | percentage end nodes           |
| Cell Cluster Graph | number central nodes           |
| Cell Cluster Graph | percentage central nodes       |
| Cell Cluster Graph | mean edge length               |
| Cell Cluster Graph | standard deviation edge length |
| Cell Cluster Graph | skewness edge length           |
| Cell Cluster Graph | kurtosis edge length           |

S2

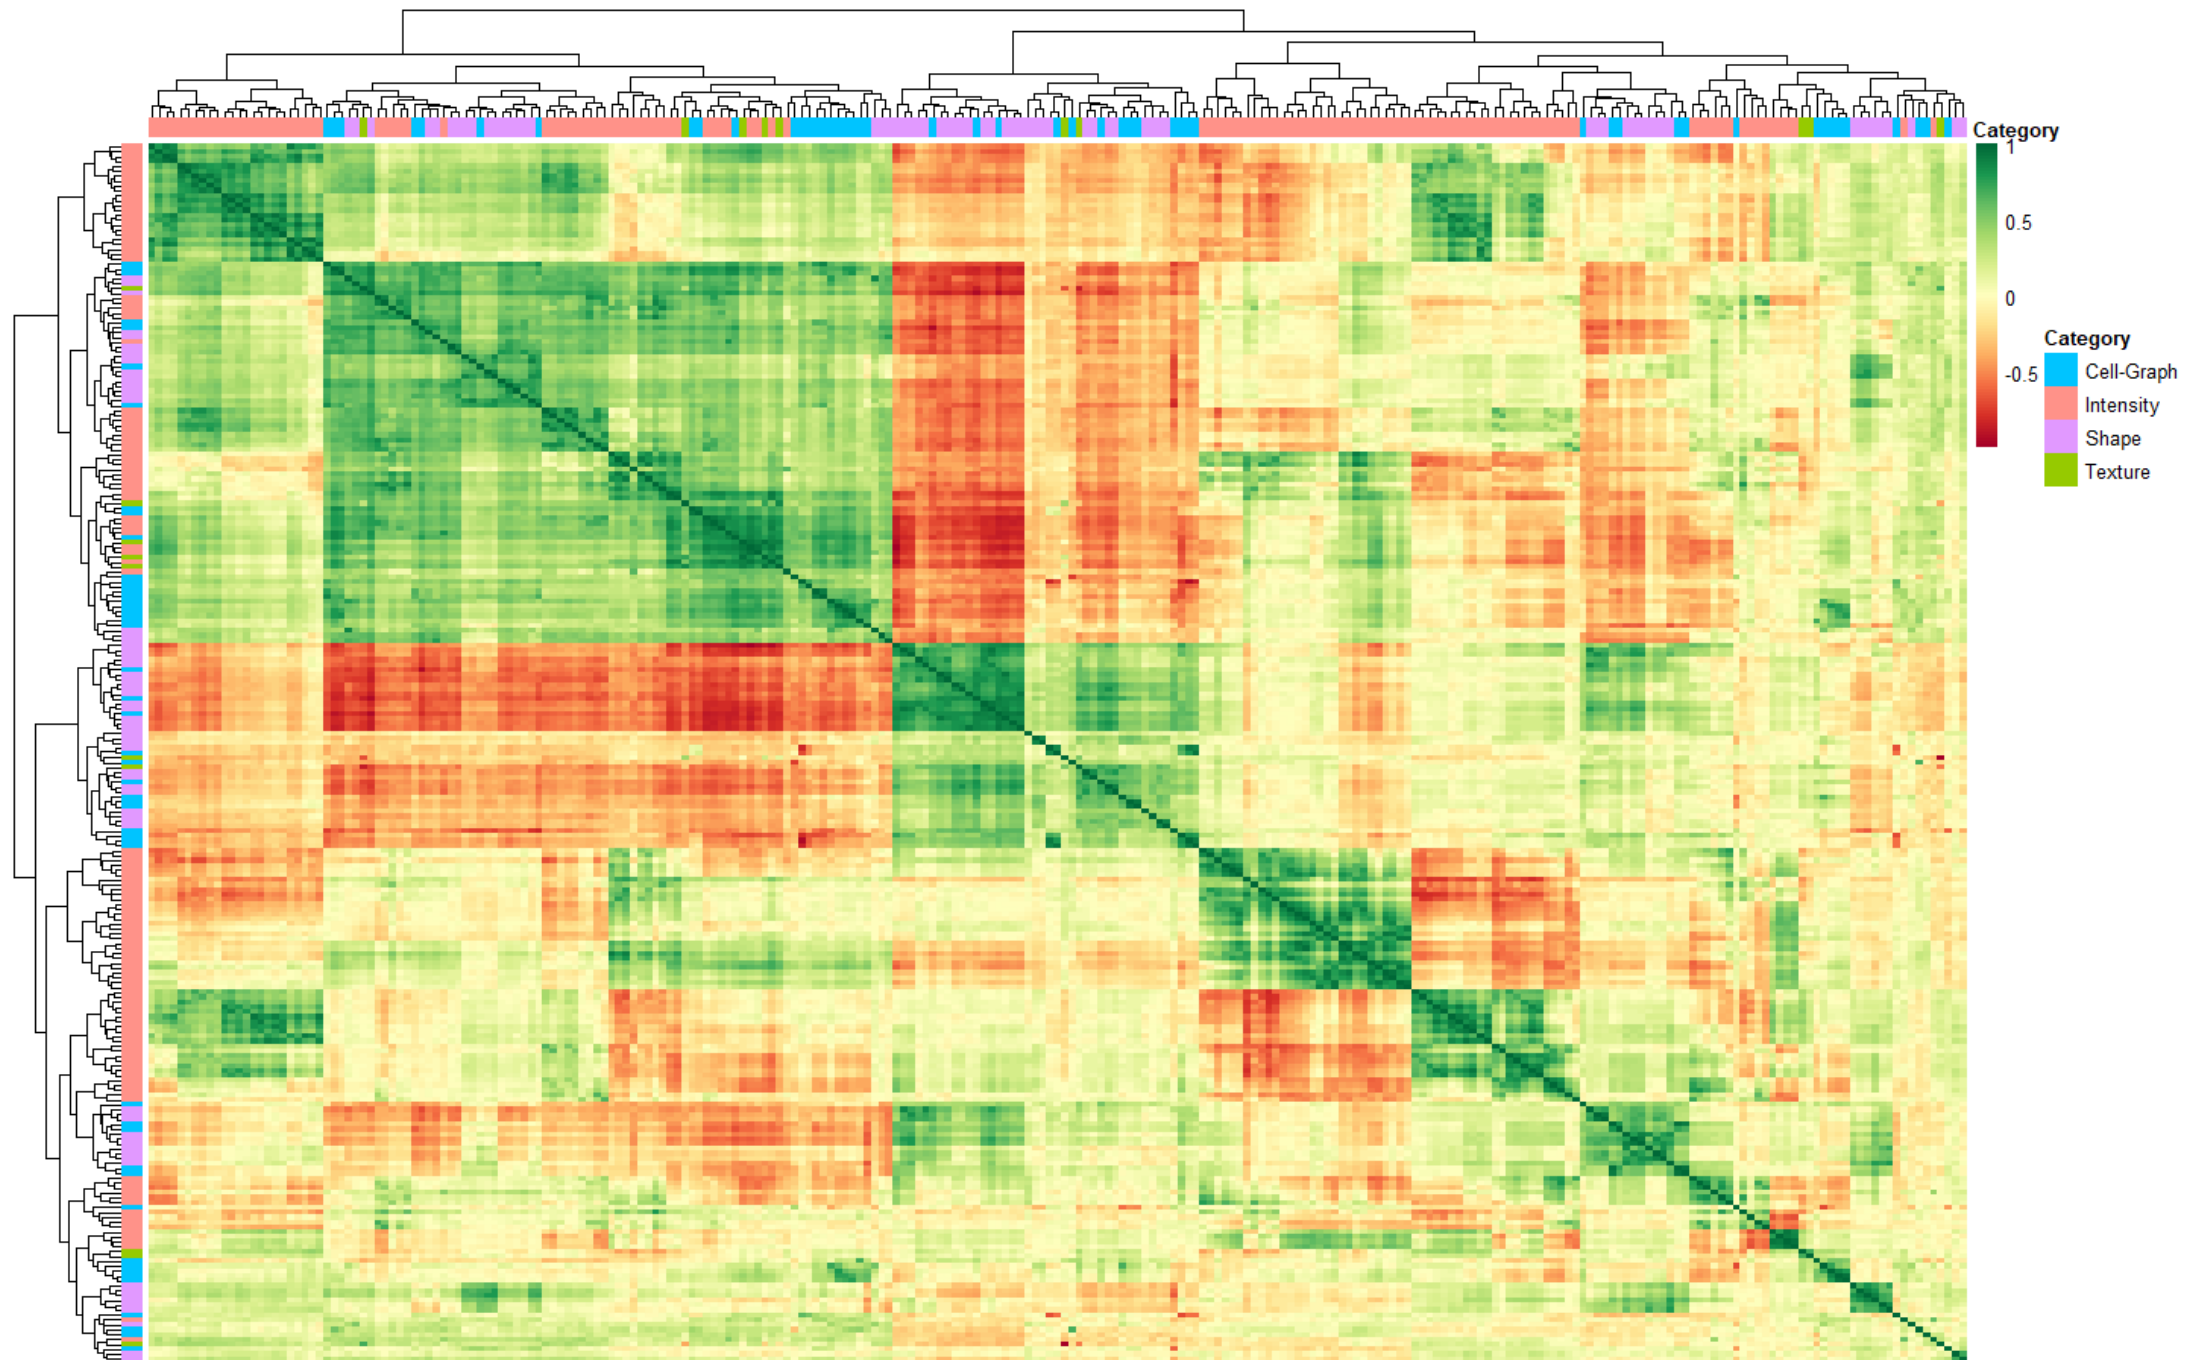

# Random Forest Patient Confusion Matrices

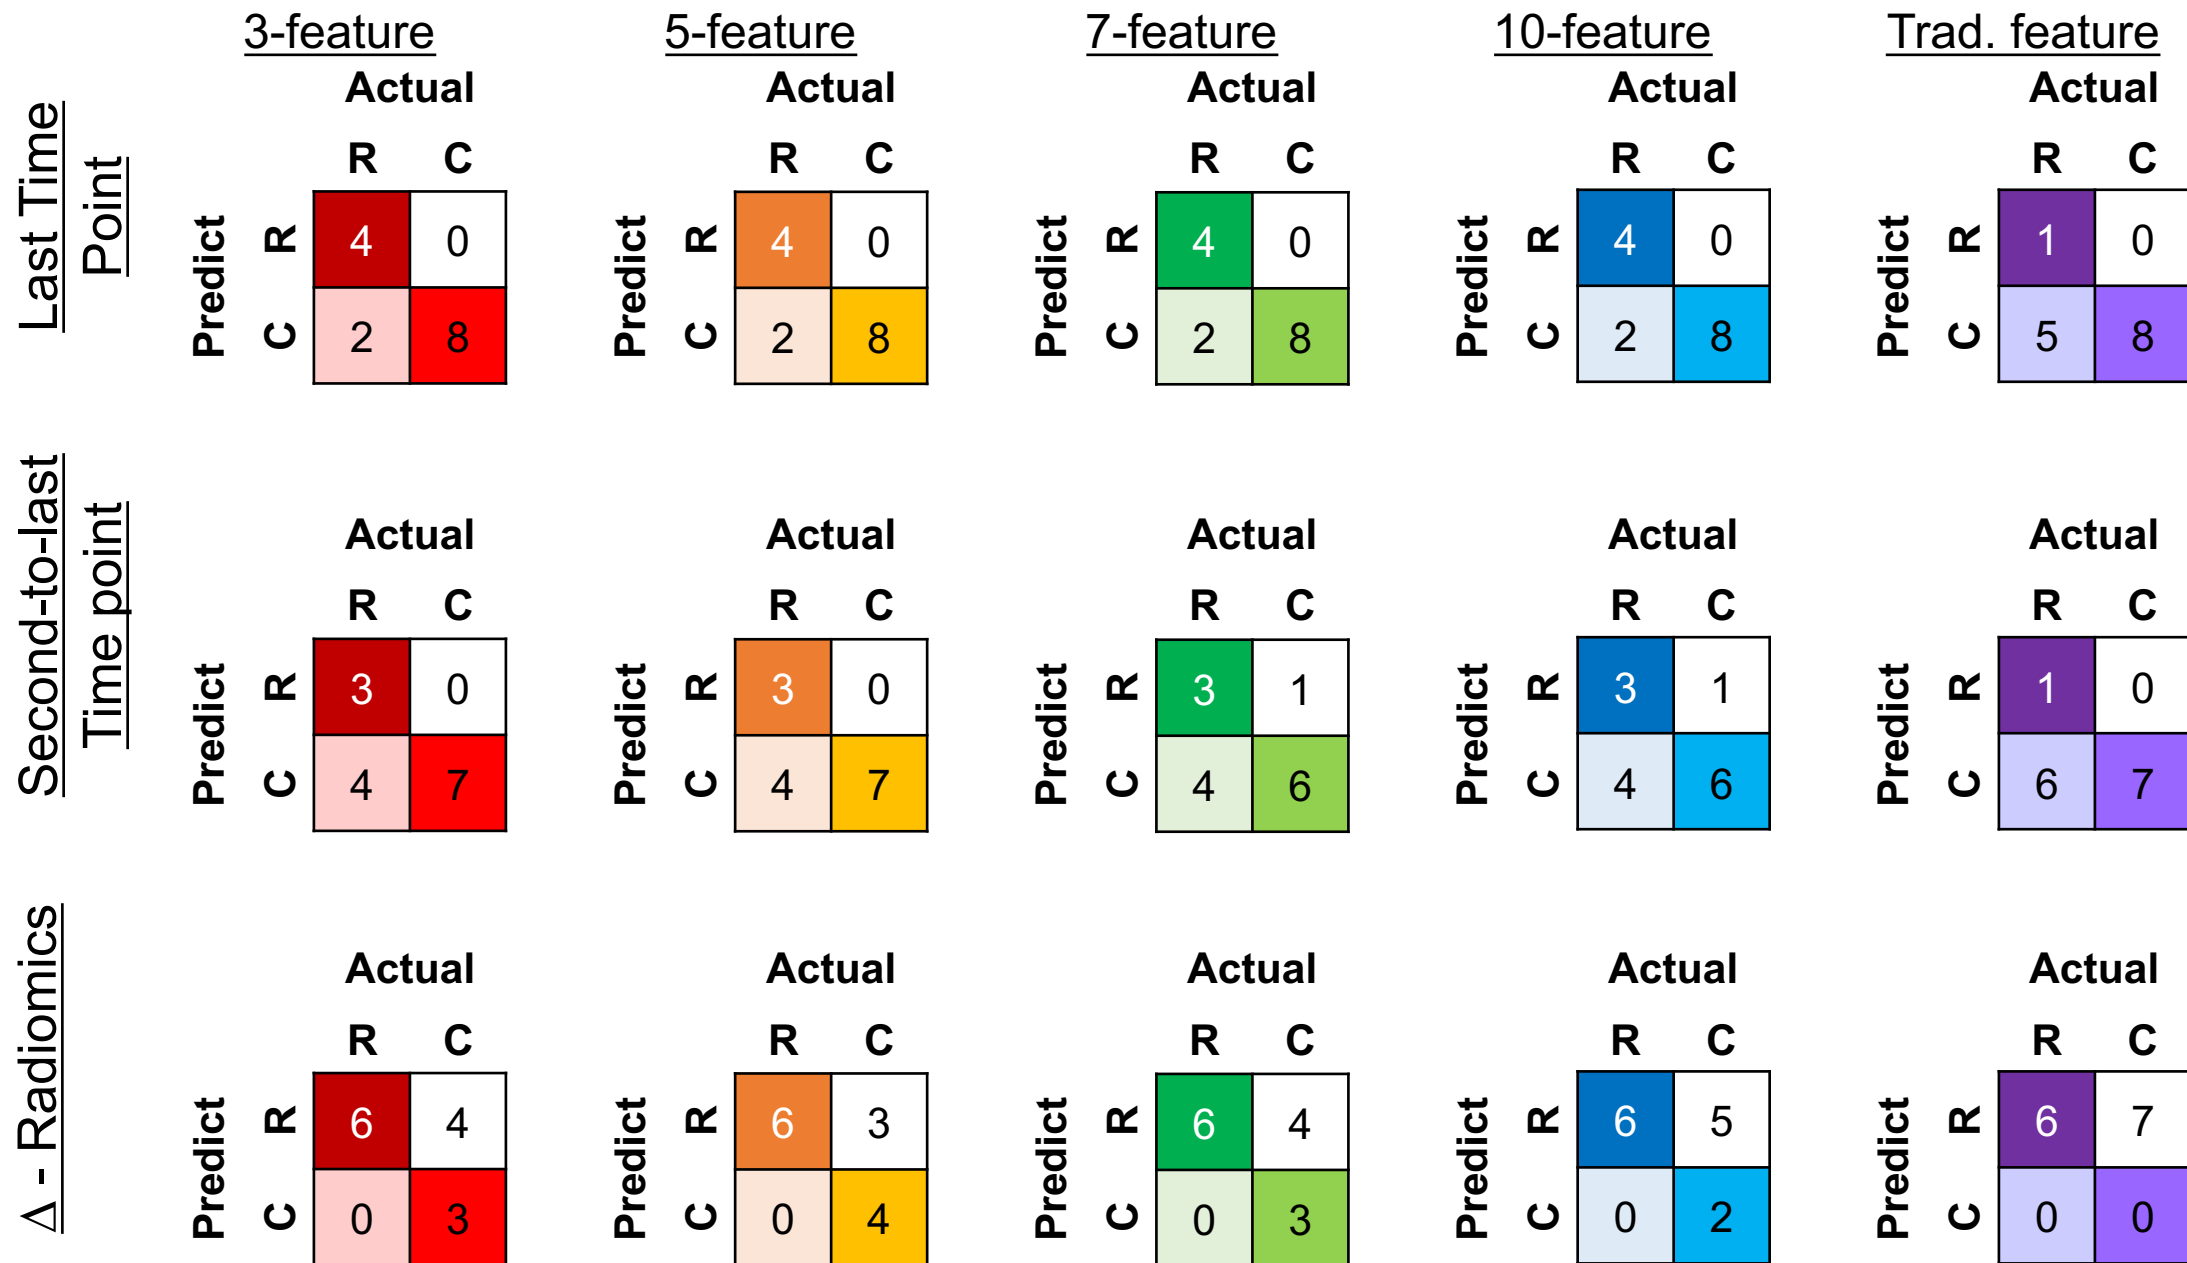

# Logistic Regression Patient Confusion Matrices

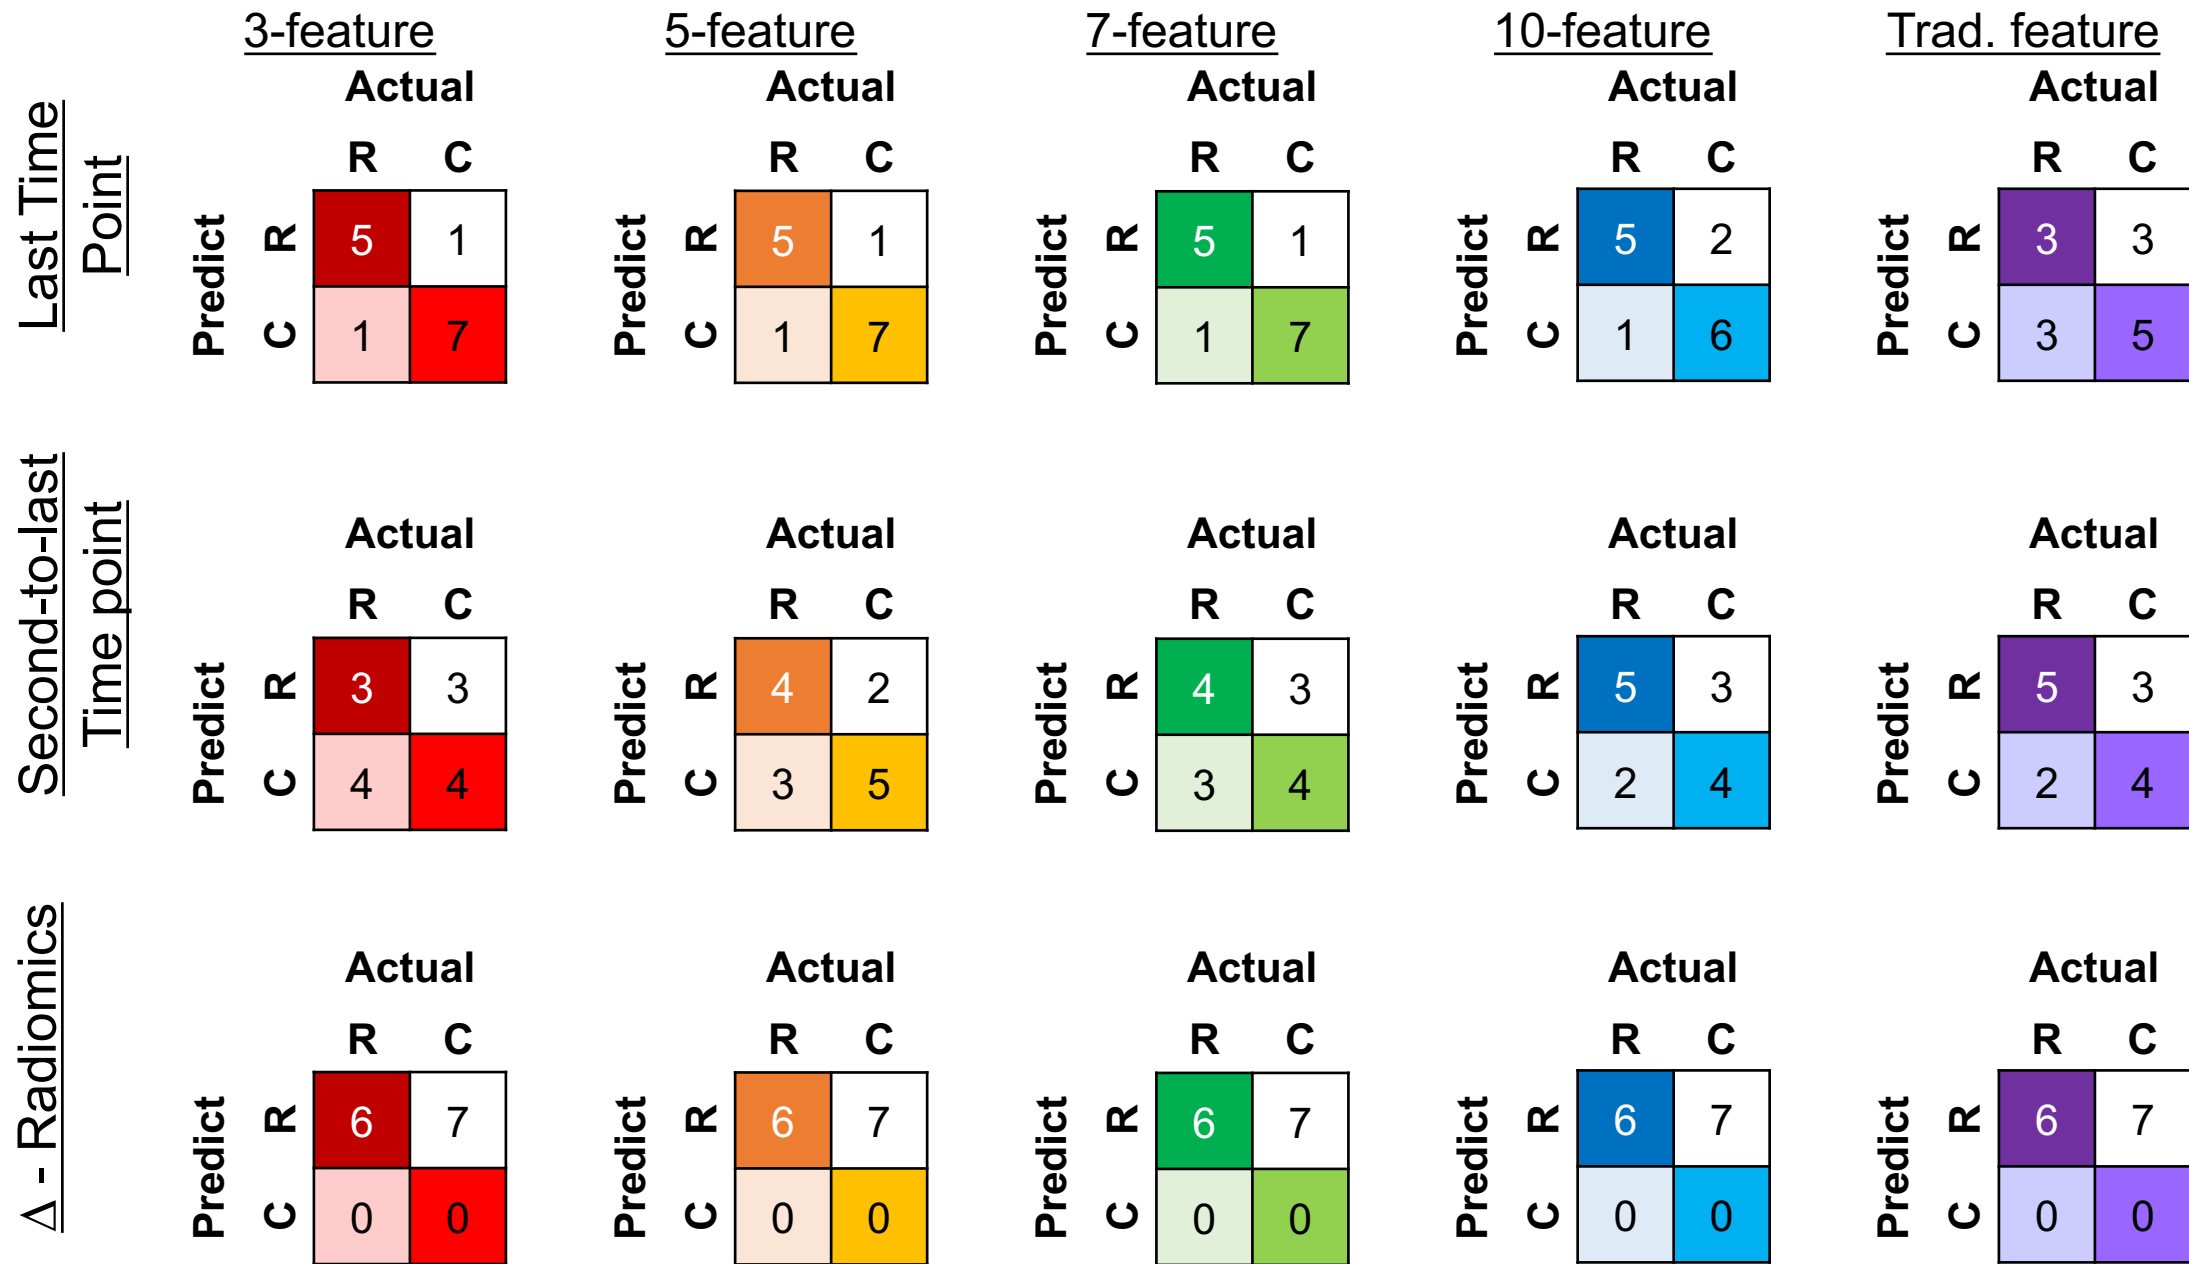

Rejection

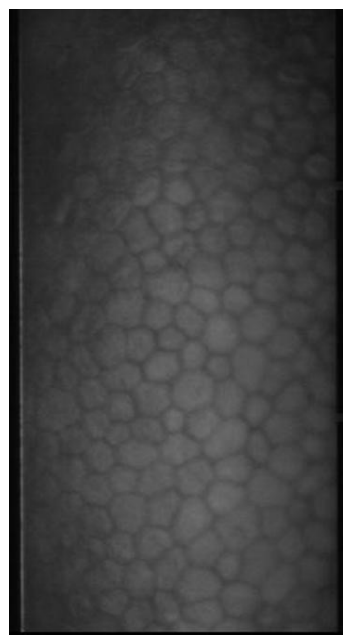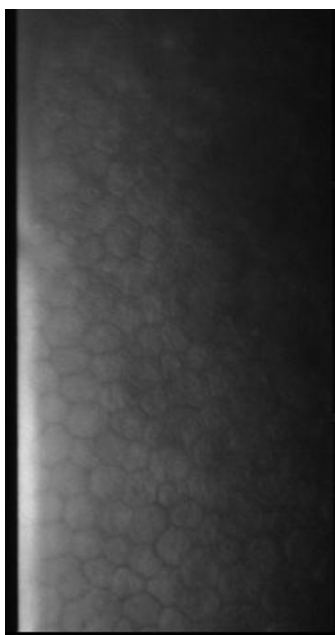

Patient Ex. 9  
T1: 12 month

Patient Ex. 9  
T2: 18 month

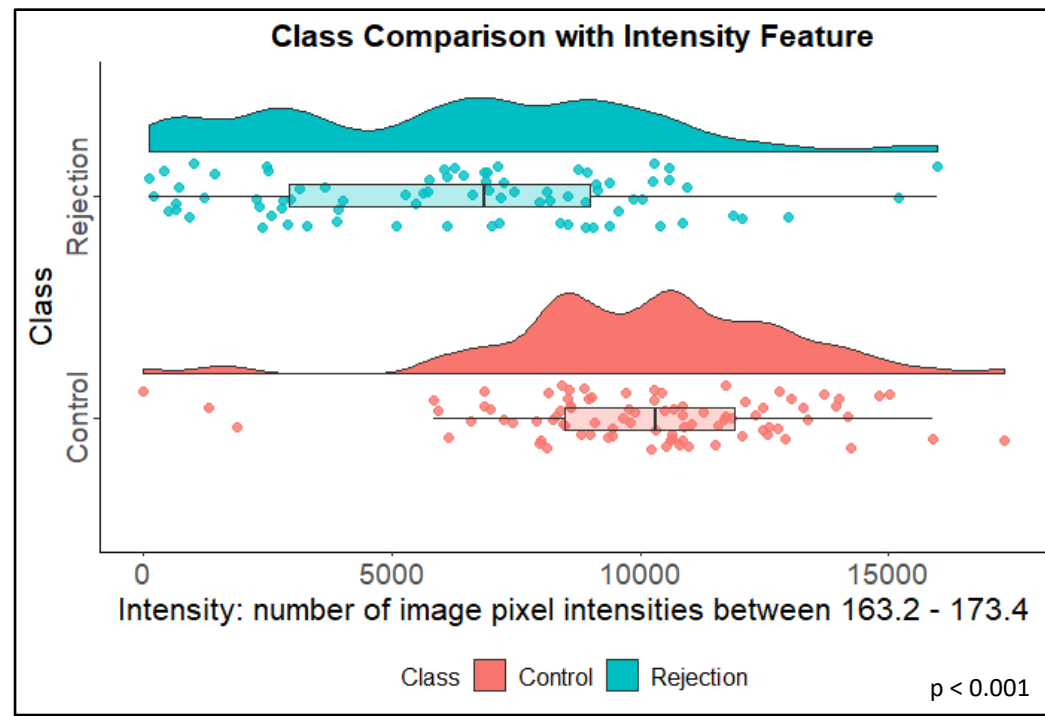

Control

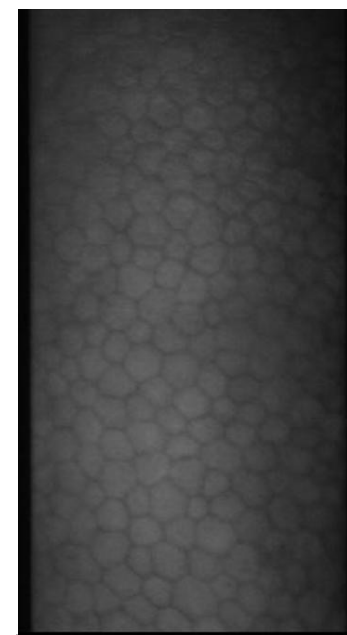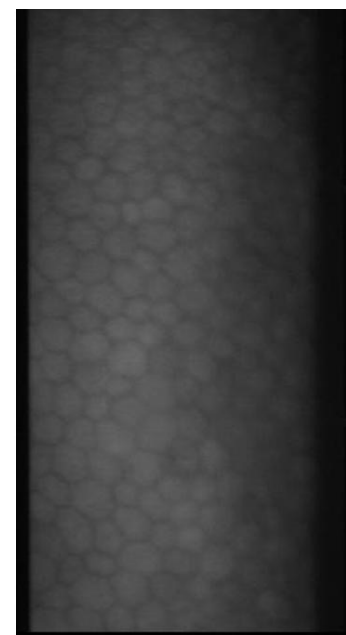

Patient Ex. 10  
T1: 19 month

Patient Ex. 10  
T2: 25 month
